# Supplementary material
Source: ML conference proceedings conference paper supplement (https://aclanthology.org/D18-1544)
Supplement: Attachment [file D18-1544.Attachment.zip]

Archive with 5 entries (2 files):
- appendix/
- appendix/appendix.pdf
- __MACOSX/
- __MACOSX/appendix/
- __MACOSX/appendix/._appendix.pdf
