# Supplementary material
Source: ML conference proceedings conference paper supplement (https://aclanthology.org/D18-1544)
Supplement: Attachment [file D18-1544.Attachment.zip › appendix/appendix.pdf]

## A Parsing-Reading-Predict Network

The forward pass of PRPN is described here. Parsing-Reading-Predict Network contains three components.

### A.1 Parsing Network

The syntactic distance between a given token represented as word embedding  $e_i$  and the previous token  $e_{i-1}$  is calculated by convolution kernel over a set of previous tokens  $e_{i-L}, e_{i-L+1}, \dots, e_i$ . Mathematically, syntactic distance  $d_i$  between  $e_{i-1}$  and  $e_i$  is computed as:

$$h_i = \text{ReLU}(W_c \begin{bmatrix} e_{i-L} \\ e_{i-L+1} \\ \dots \\ e_i \end{bmatrix} + b_c) \quad (1)$$

$$d_i = \text{ReLU}(W_d h_i + b_d) \quad (2)$$

where  $W_c, b_c$  are the kernel parameters.  $W_d$  and  $b_d$  can be seen as another convolutional kernel with window size 1, convolved over  $h_i$ 's. The kernel window size  $L$ , that indicates how far back into the history node  $e_i$  can reach while computing its syntactic distance  $d_i$ , is called the *look-back range*. For the tokens in the beginning of the sequence,  $L - 1$  zero vectors are padded to the front of the sequence. This will produce  $K - 1$  distances for sequence length of  $K$ .

To determine the closest word  $x_j$  that has larger syntactic relationship than  $d_j$  for time step  $t$ ,  $\alpha_j^t$  is defined as:

$$\alpha_j^t = \frac{\text{hardtanh}((d_t - d_j) \cdot \tau) + 1}{2} \quad (3)$$

where  $\tau$  is the temperature parameter that controls the sensitivity of  $\alpha_j^t$  to the differences between distances.

The soft gate values that will be used for language modeling are then computed as:

$$g_i^t = \mathbf{P}(l_t \leq i) = \prod_{j=i+1}^{t-1} \alpha_j^t \quad (4)$$

### A.2 Reading Network

The reading network uses Long Short-Term Memory-Network that maintains two sets of vectors as the memory states: a hidden tape  $H_{t-1} = (h_{t-N_m}, \dots, h_{t-1})$ , and a memory tape  $C_{t-1} = (c_{t-L}, \dots, c_{t-1})$ , where  $N_m$  is the upper bound for

the memory span. Hidden state  $m_i$  is represented by a tuple of two vectors  $(h_i, c_i)$ .

At each step, the reading network links the current token to all the previous tokens that are syntactically similar:

$$k_t = W_h h_{t-1} + W_x x_t \quad (5)$$

$$\tilde{s}_i^t = \text{softmax}\left(\frac{h_i k_t^T}{\sqrt{\delta_k}}\right) \quad (6)$$

where,  $\delta_k$  is the dimension of the hidden state. The structured intra-attention weight is defined based on the gates in Eq.4:

$$s_i^t = \frac{g_i^t \tilde{s}_i^t}{\sum_i g_i^t} \quad (7)$$

An adaptive summary vector for the previous hidden tape and memory denoted by  $\tilde{h}_t$  and  $\tilde{c}_t$  are computed as:

$$\begin{bmatrix} \tilde{h}_t \\ \tilde{c}_t \end{bmatrix} = \sum_{i=1}^{t-1} s_i^t \cdot m_i = \sum_{i=1}^{t-1} s_i^t \cdot \begin{bmatrix} h_i \\ c_i \end{bmatrix} \quad (8)$$

The Reading Network then takes  $x_t$ ,  $\tilde{c}_t$  and  $\tilde{h}_t$  as input, computes the values of  $c_t$  and  $h_t$  by the LSTM recurrent update (Hochreiter and Schmidhuber, 1996). Then the *write* operation concatenates  $h_t$  and  $c_t$  to the end of hidden and memory tape.

### A.3 Predict Network

Predict Network models the probability distribution of next word  $x_{t+1}$ , based on hidden states  $m_0, \dots, m_t$ , and gates  $g_0^{t+1}, \dots, g_t^{t+1}$ :

$$p(x_{t+1} | x_{t < t+1}) \approx p(x_{t+1}; f(m_{t < t+1}, g_{t < t+1}^{t+1})) \quad (9)$$

Since the model cannot observe  $x_{t+1}$  at time step  $t$ , a temporary estimation of  $d_{t+1}$  is computed using  $x_{t-L}, \dots, x_t$ :

$$d'_{t+1} = \text{ReLU}(W'_d h_t + b'_d) \quad (10)$$

The corresponding  $\{\alpha^{t+1}\}$  and  $\{g_i^{t+1}\}$  for Eq.9 are computed after that.  $f(\cdot)$  function is parameterized as:

$$f(m_t, \dots, m_t, g_0^{t+1}, \dots, g_t^{t+1}) = \hat{f}([h_{l:t-1}, h_t]) \quad (11)$$

where  $h_{l:t-1}$  is an adaptive summary of  $h_{l+1 \leq i \leq t-1}$ , output by structured attention

controlled by  $g_0^{t+1}, \dots, g_{t-1}^{t+1}$ .  $\hat{f}(\cdot)$  could be a simple feed-forward MLP, or more complex architecture, like ResNet, to add more depth to the model.

#### **A.4 Sample Parses from the model with the best F1 score**

In Figure [A.1](#), we report a few example parses from the model with the best F1 score (PRPN-UP trained on AllNLI) among our experiments, compared with the ground truth PTB parses.

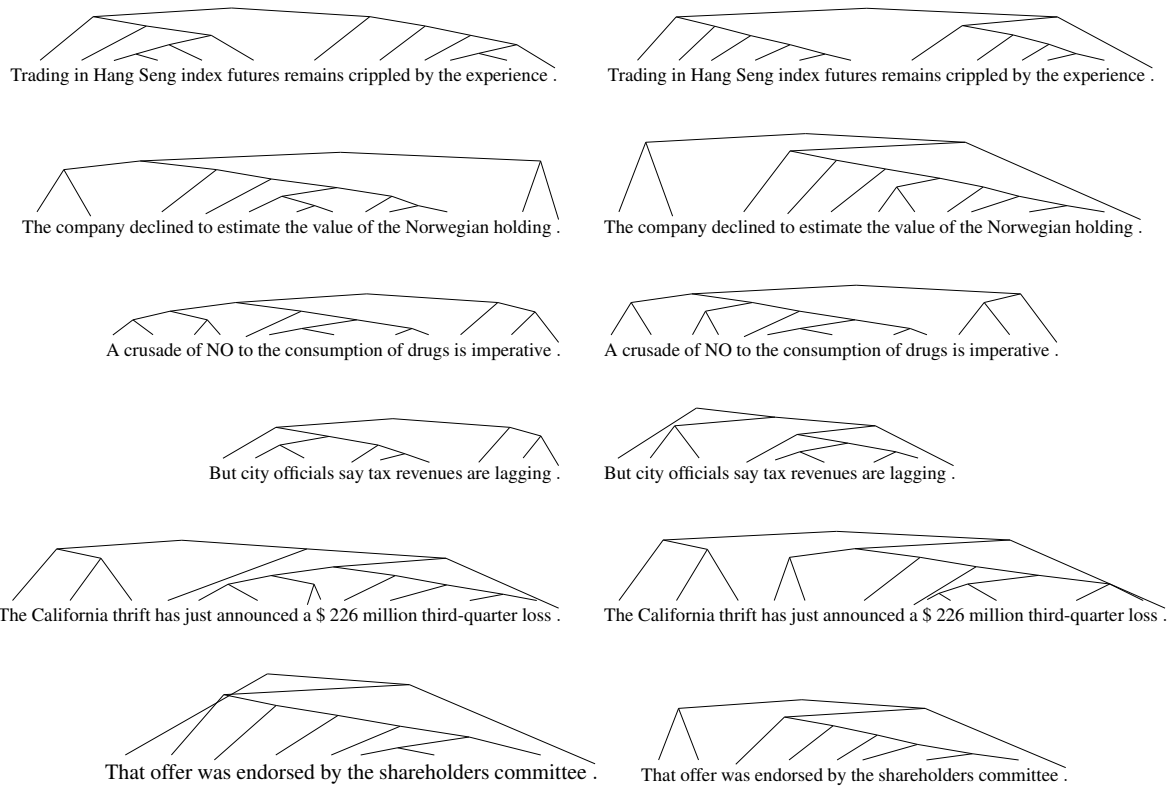

Figure A.1: *Left* Parses from PRPN-LM trained on AllNLI (stopping criterion: language modeling). *Right* Ground truth parses from Penn Treebank.
